# Supplementary material for: Global warming projections derived from an observation-based minimal model
Source: Copernicus journal article supplement (doi:10.5194/esd-7-51-2016), 2016-01-29
Supplement: Supplementary file [file esd-7-51-2016-supplement-title-page.pdf › esd-7-51-2016-supplement-title-page.pdf]

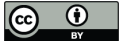

## *Supplement of*

# **Global warming projections derived from an observation-based minimal model**

**K. Rypdal**

*Correspondence to:* K. Rypdal ([kristoffer.rypdal@uit.no](mailto:kristoffer.rypdal@uit.no))

- esd-7-51-2016-supplement-title-page.pdf
- Supplementary Material
  - .DS\_Store
  - Forcing\_datafile.txt
  - Global instrumental.txt
  - MuanaLua\_numbers.txt
  - Read me.txt
- \_\_MACOSX
  - .\_Supplementary Material
  - Supplementary Material
    - \* .\_DS\_Store
    - \* .\_Forcing\_datafile.txt
    - \* .\_Global instrumental.txt
    - \* .\_MuanaLua\_numbers.txt
    - \* .\_Read me.txt

The copyright of individual parts of the supplement might differ from the CC-BY 3.0 licence.
